# Supplementary material
Source: MDPI journal article supplement (https://www.mdpi.com/2073-4433/13/4/516)
Supplement: s1 [file s1 › atmosphere-1589715-supplementary.pdf]

# Supplementary Materials: Air Quality Impact Assessment of a Waste-to-Energy Plant: Modelling Results vs. Monitored Data

Giovanni Lonati <sup>1,\*</sup>, Stefano Cernuschi <sup>1</sup> and Paolo Giani <sup>2</sup>

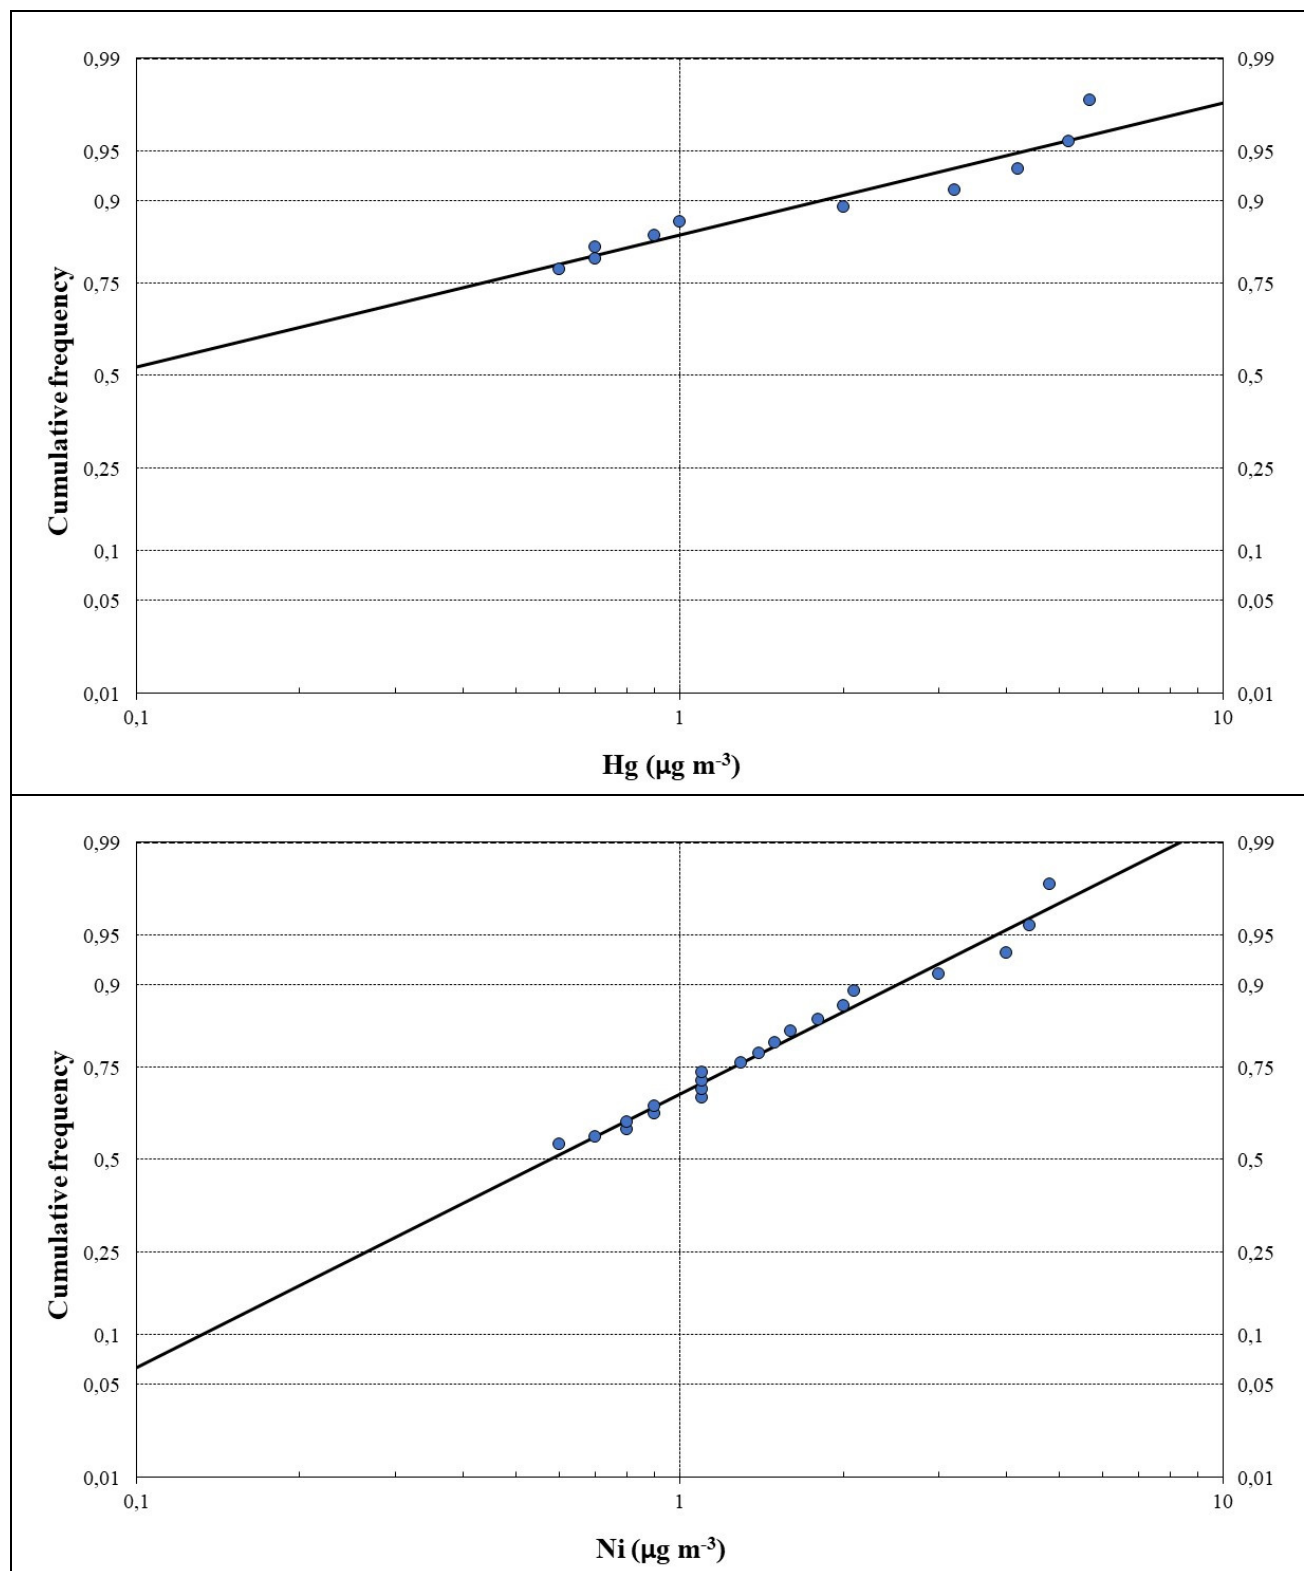

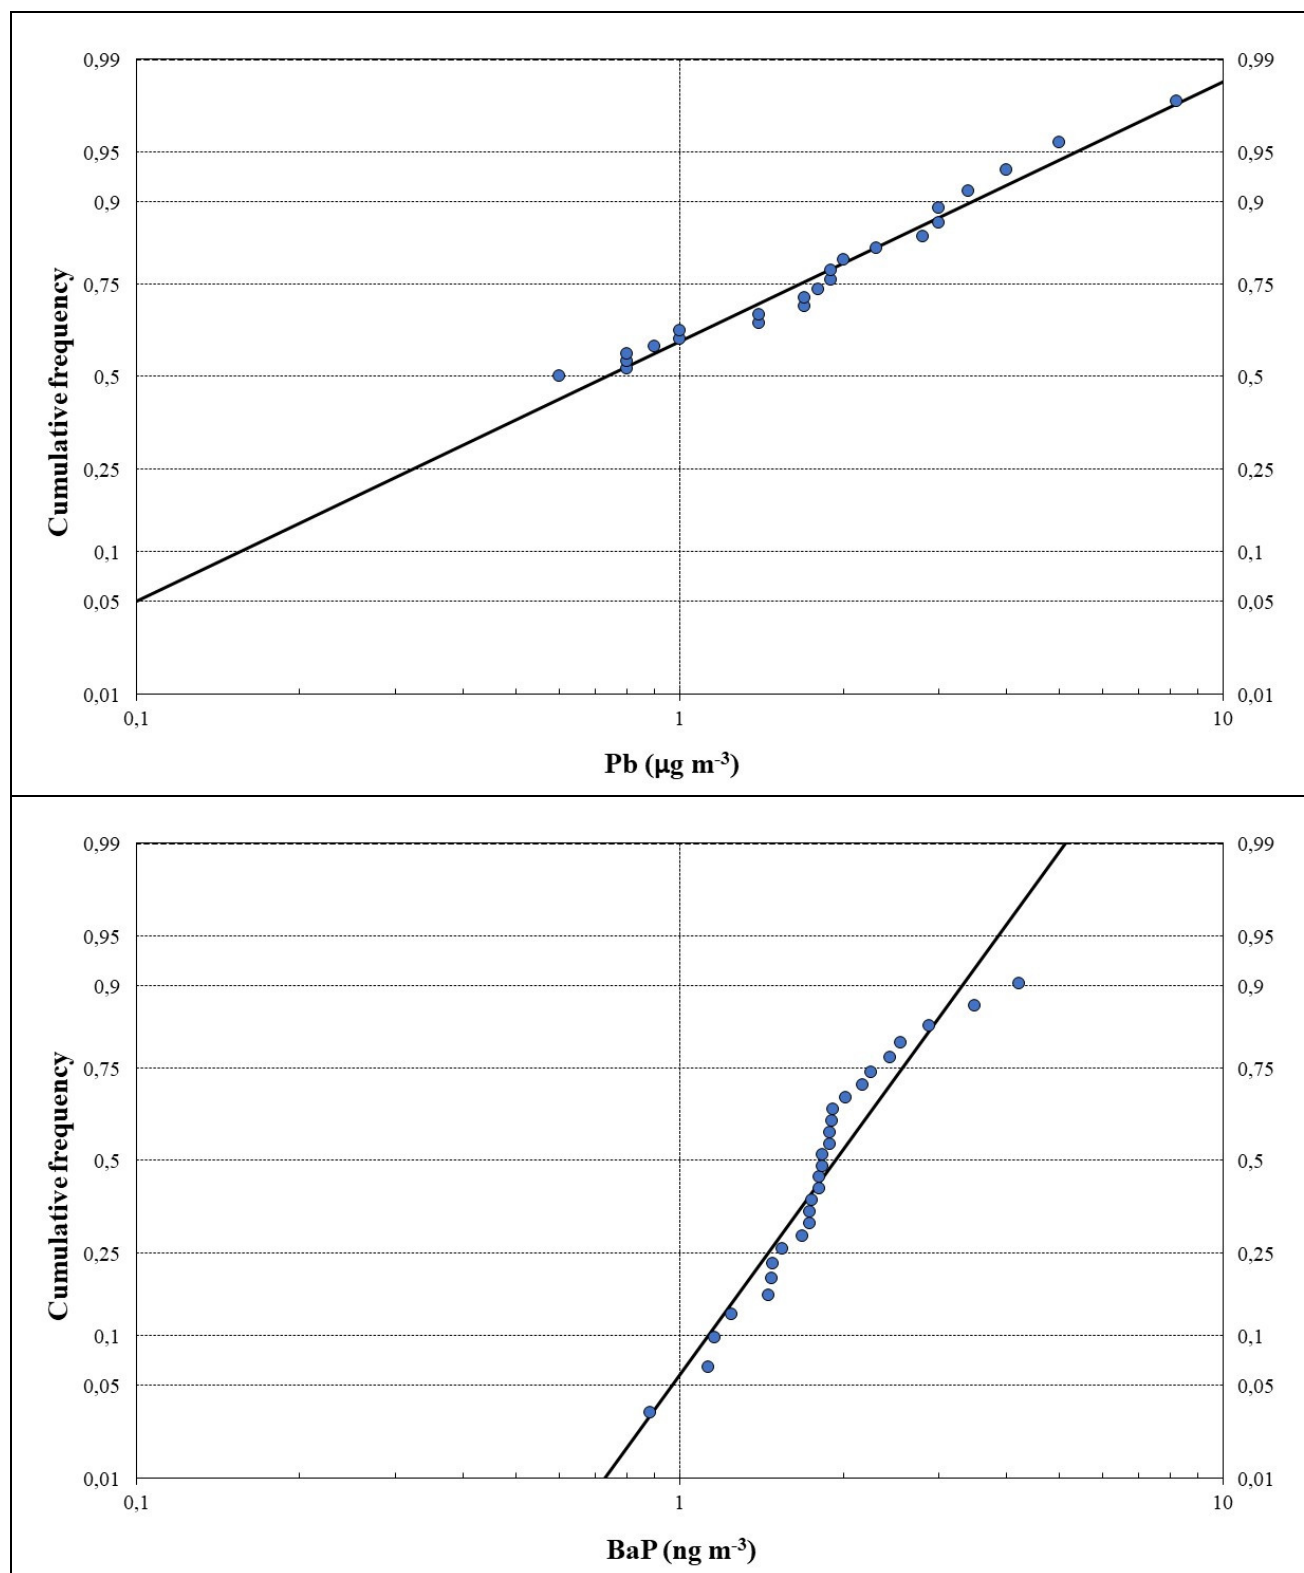

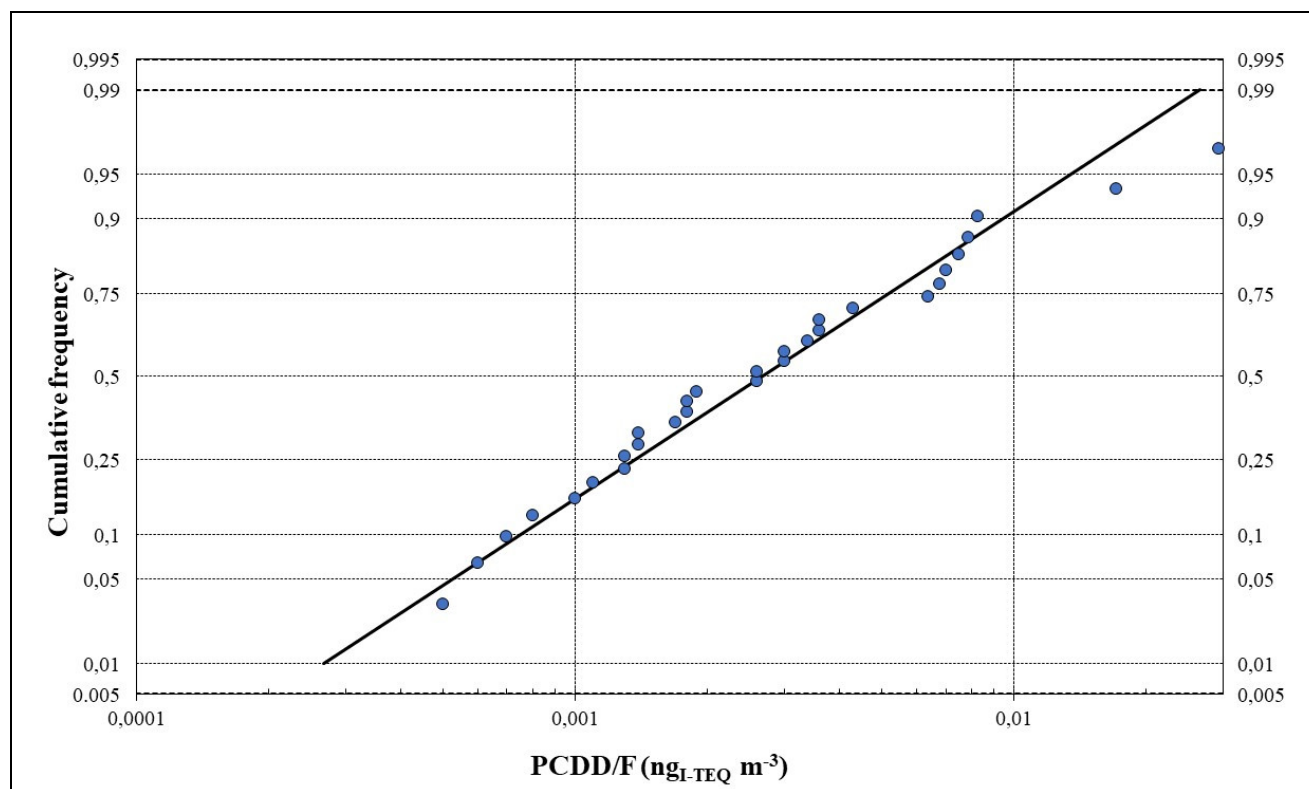

**Figure S1.** – Distributions of flue gas concentration of Hg, Ni, Pb, BaP, and PCDD/F (all concentrations referred to 0 °C, 101.3 kPa, dry basis, 11% O<sub>2</sub>).

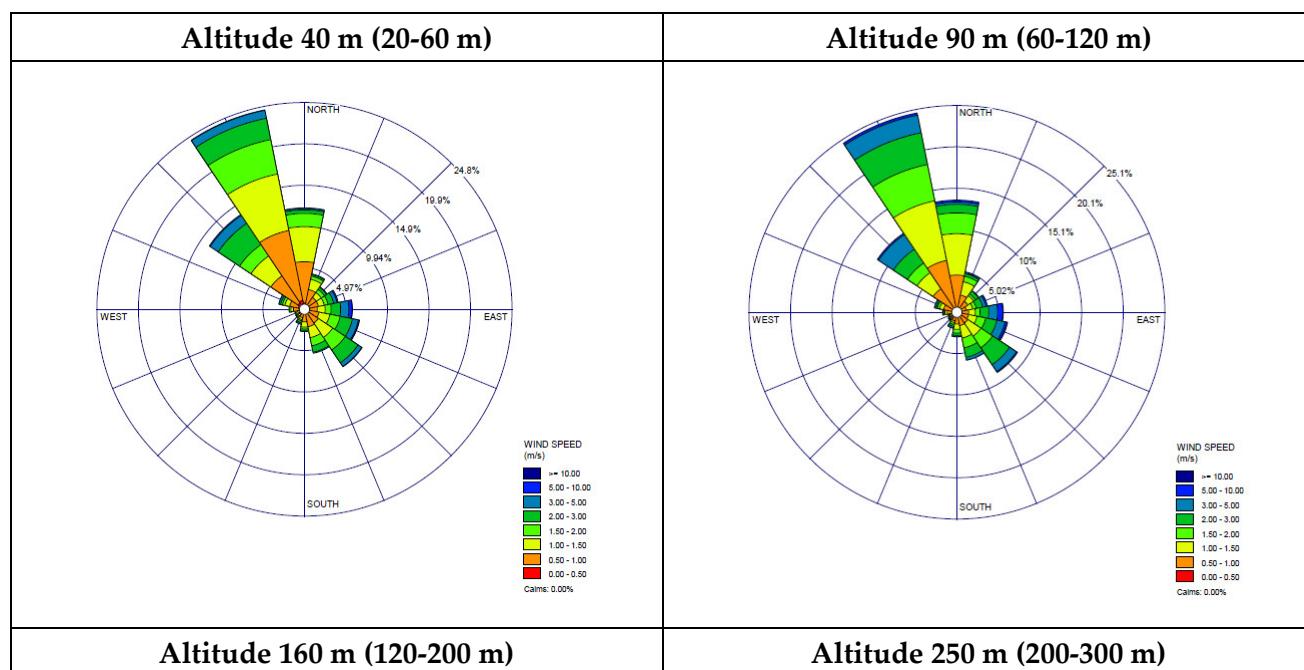

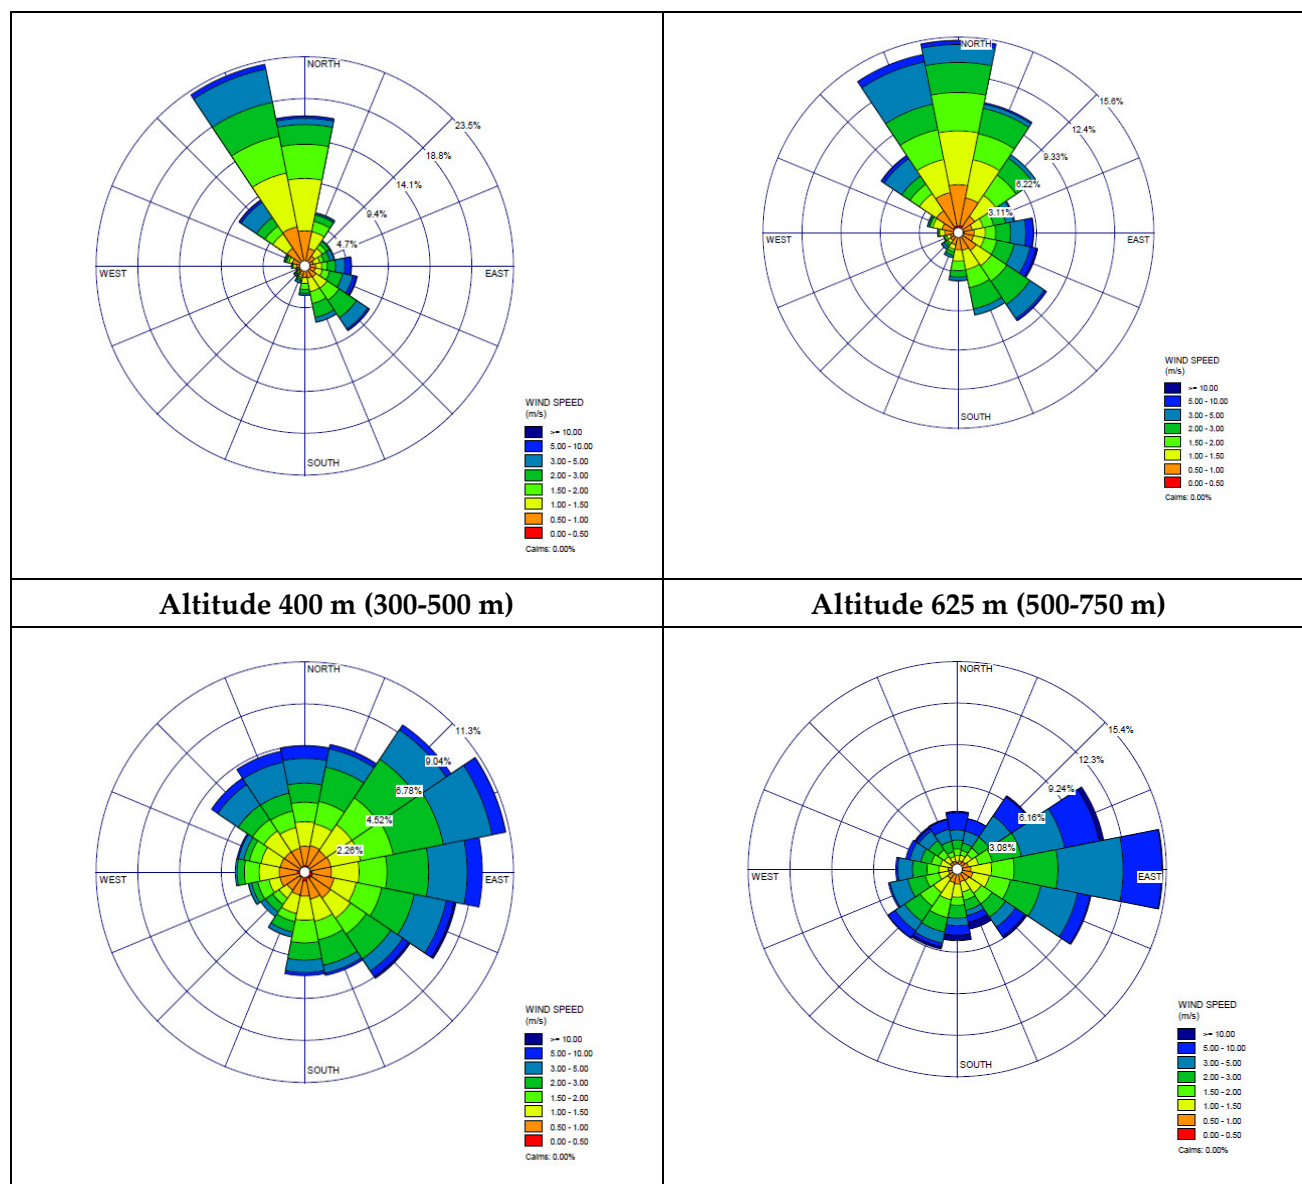

**Figure S2.** – Wind roses at different altitude above sea level at the plant location for the simulation reference period (01/05/2018-30/04/2019).

| Cold season | Warm season |
|-------------|-------------|
|-------------|-------------|

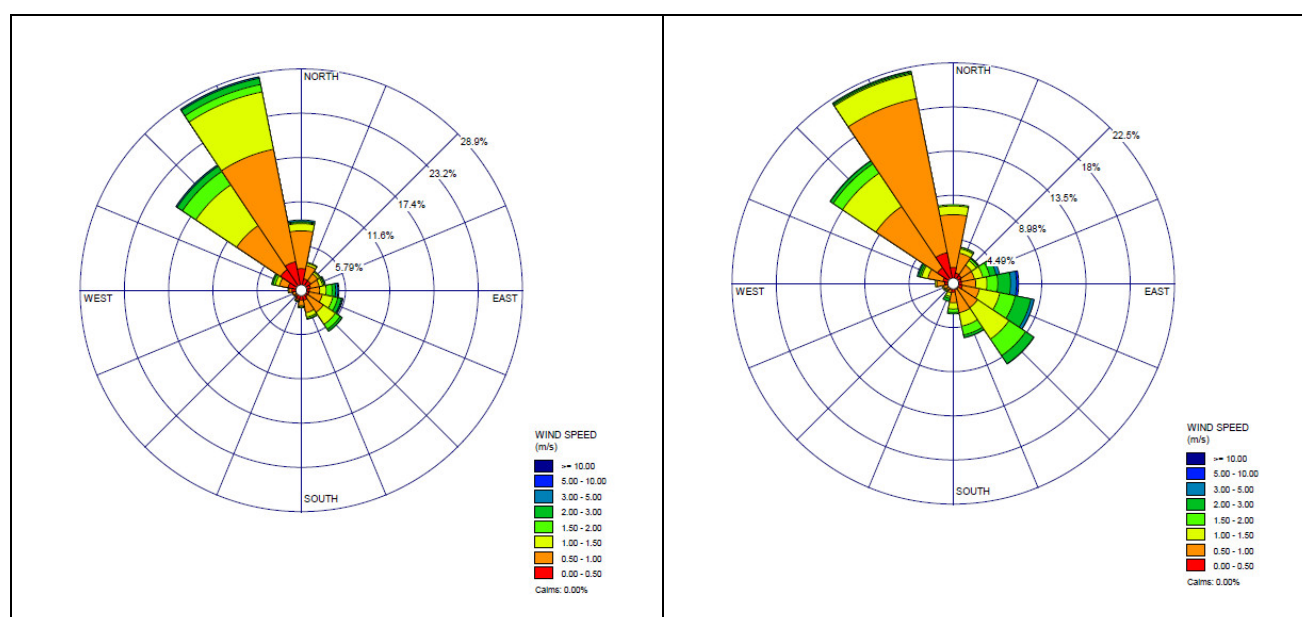

**Figure S3.** Cold (Oct. 2018-Mar. 2019) and warm season (May 2018-Sep. 2018 and Apr. 2019) ground-level wind roses at the plant location for the simulation reference period (01/05/2018-30/04/2019).

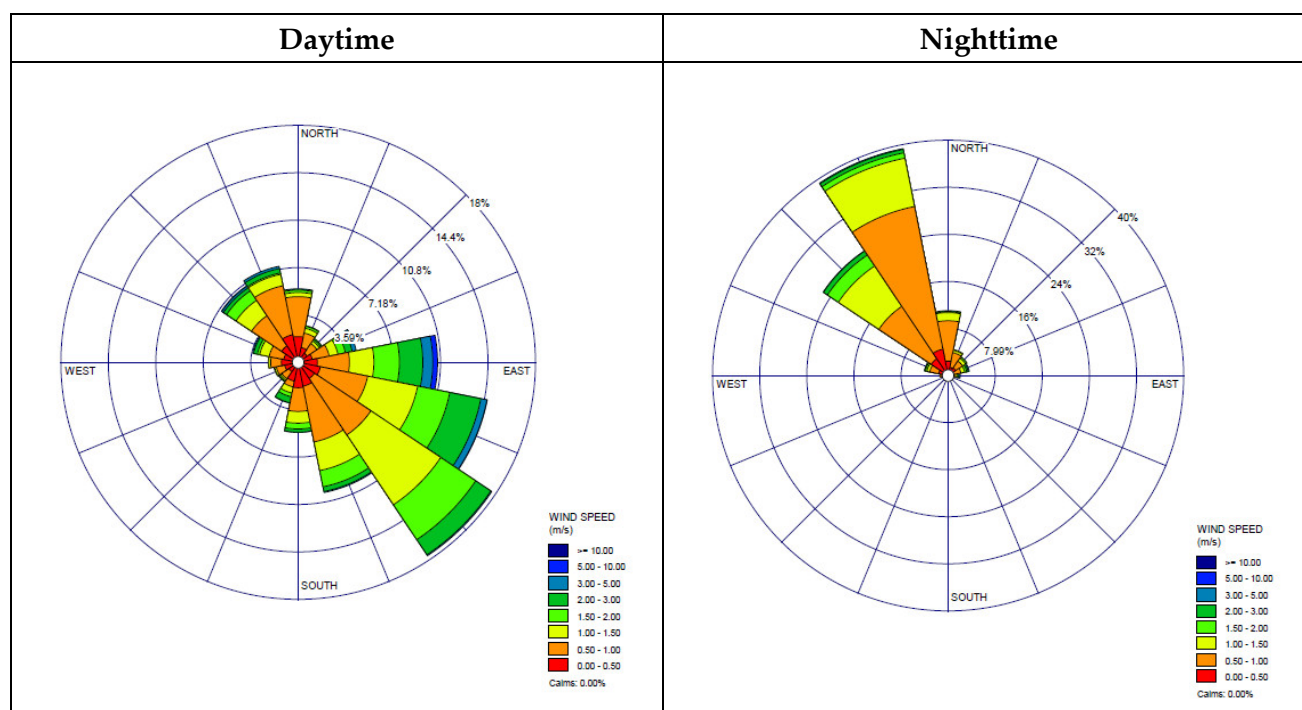

**Figure S4.** Daytime and nighttime ground-level wind roses at the plant location for the simulation reference period (01/05/2018-30/04/2019).

04/06/2018-11/06/2018

11/09/2018-18/09/2018

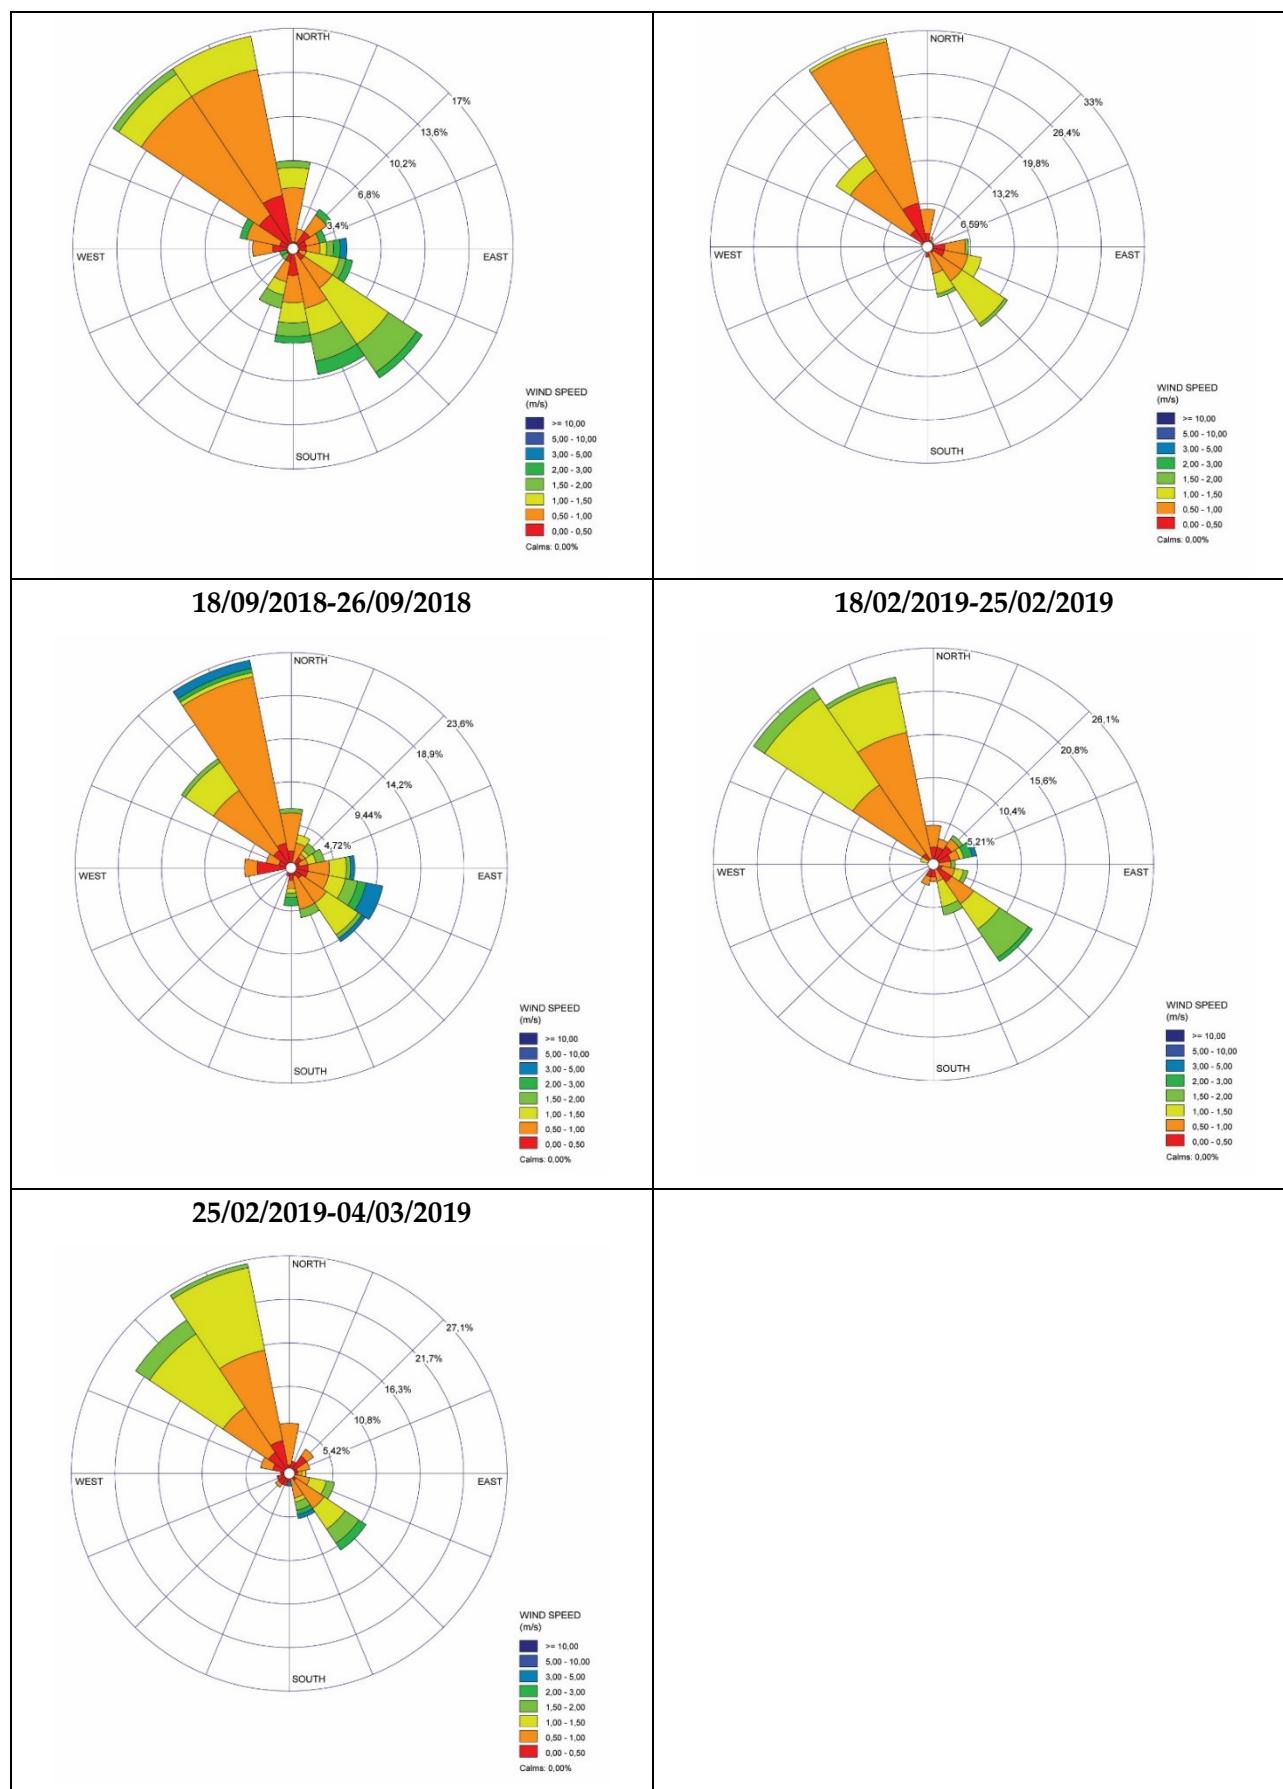

Figure S5. – Ground-level wind roses at the plant location for the monitoring campaign periods.

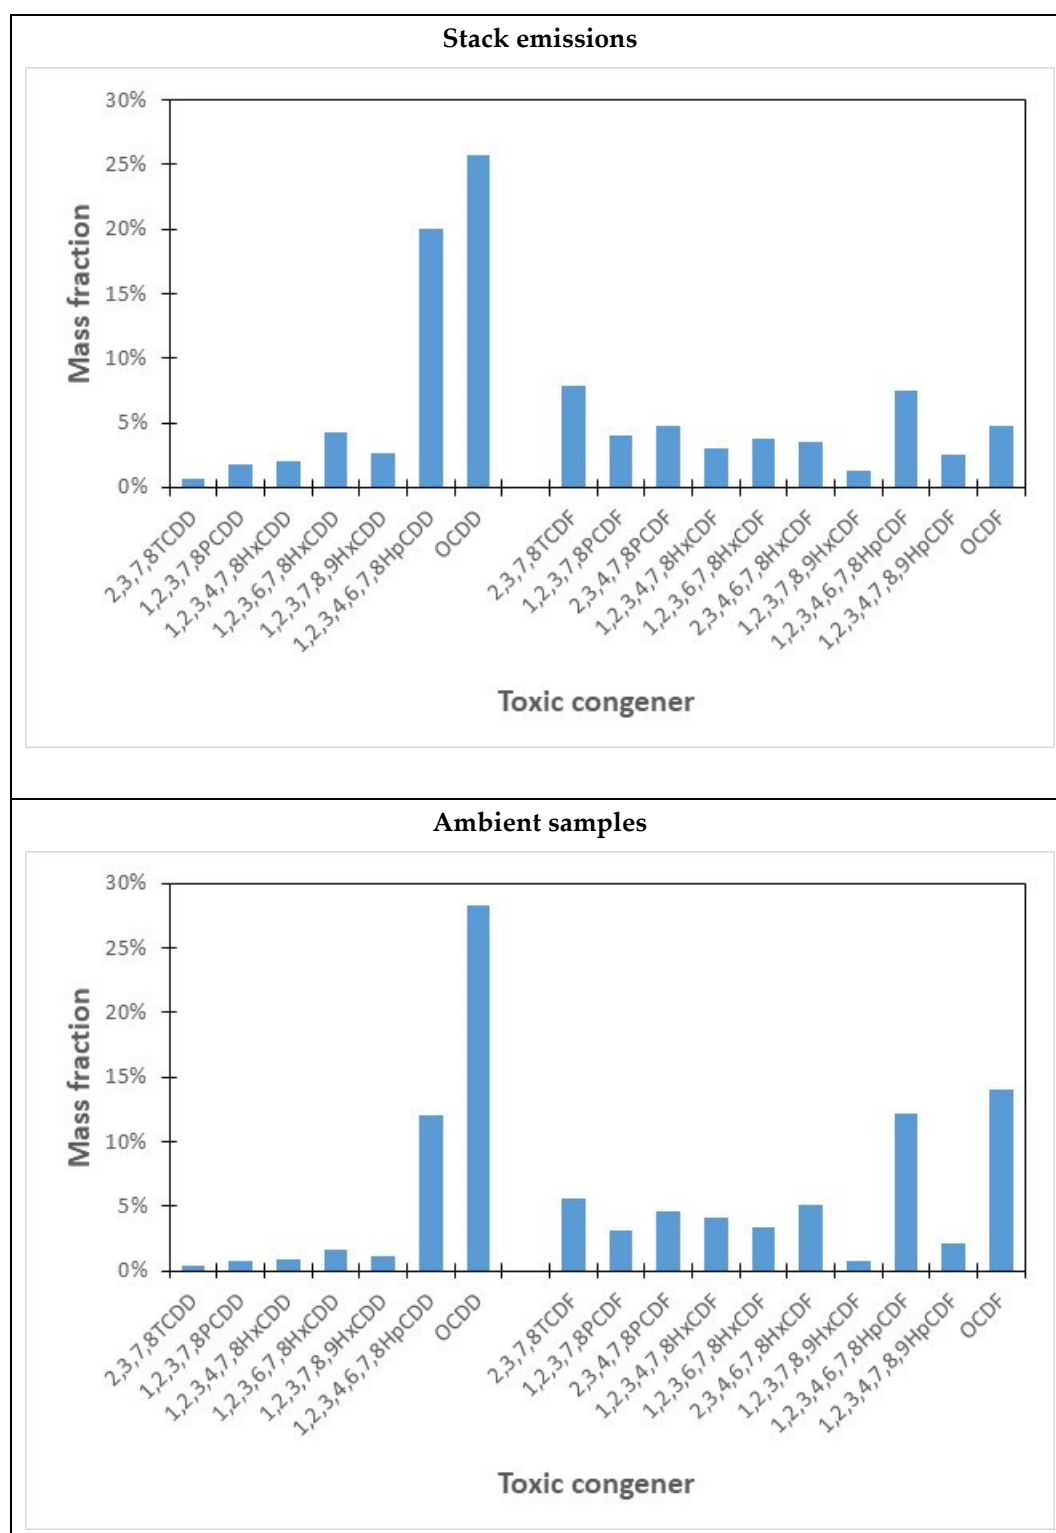

**Figure S6.** – Fingerprints (relative abundance by mass) of PCDD/F toxic congeners in the WtE plant's emission and in the ambient air samples.

**Table S1.** - Emission inventory data for the municipalities within the modelling domain (percentage contributions to annual emissions by sectors).

| SNAP sector                                                       | NOx   | PM10  | As    | Cd    | Ni    | Pb    | B(a)P  |
|-------------------------------------------------------------------|-------|-------|-------|-------|-------|-------|--------|
| Non-industrial combustion plants                                  | 17.8% | 75.9% | 5.3%  | 56.5% | 6.5%  | 9.3%  | 96.89% |
| Combustion in manufacturing industry                              | 29.6% | 3.4%  | 9.7%  | 31.1% | 70.0% | 77.7% | 1.55%  |
| Production processes                                              | 1.1%  | 0.6%  | 0.0%  | 0.0%  | 0.0%  | 0.0%  | 0.0%   |
| Extraction and distribution of fossil fuels and geothermal energy | 0.0%  | 0.0%  | 0.0%  | 0.0%  | 0.0%  | 0.0%  | 0.0%   |
| Solvent use and other products use                                | 0.0%  | 4.8%  | 0.0%  | 0.2%  | 0.0%  | 0.0%  | 0.0%   |
| Road transport                                                    | 40.9% | 8.0%  | 5.8%  | 2.9%  | 6.5%  | 8.3%  | 0.66%  |
| Other mobile source and machinery                                 | 5.5%  | 0.9%  | 0.0%  | 0.1%  | 0.4%  | 0.0%  | 0.03%  |
| Waste treatment and disposal                                      | 4.8%  | 0.2%  | 78.6% | 2.5%  | 11.5% | 0.8%  | 0.002% |
| Agriculture                                                       | 0.1%  | 1.4%  | 0.0%  | 0.0%  | 0.0%  | 0.0%  | 0.0%   |
| Other sources and sinks                                           | 0.2%  | 4.7%  | 0.6%  | 6.7%  | 5.2%  | 3.9%  | 0.86%  |
